# Supplementary material
Source: PubMed Central journal article supplement (PMC3488853)

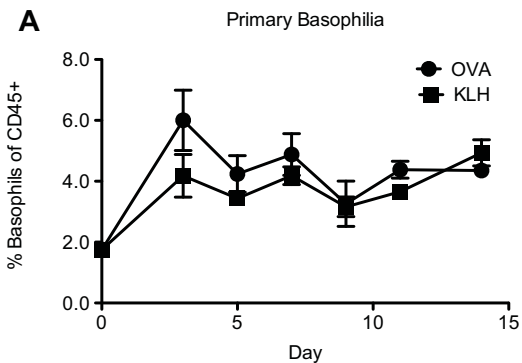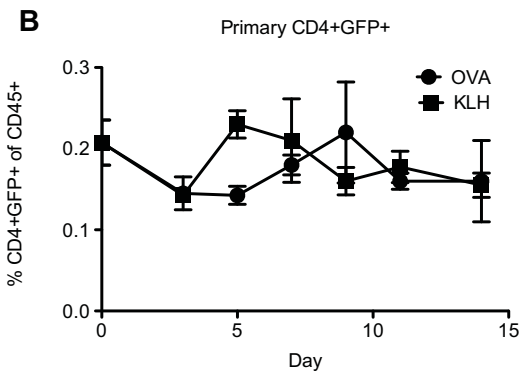

Supplementary Figure 1

Supplement: NIHMS409925-supplement-FS1.pdf [file NIHMS409925-supplement-FS1.pdf]

**A**

5CC7 CD4+  
Transferred:  
Recipient:

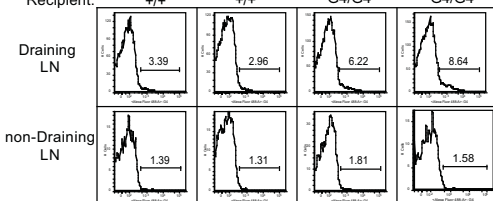**B**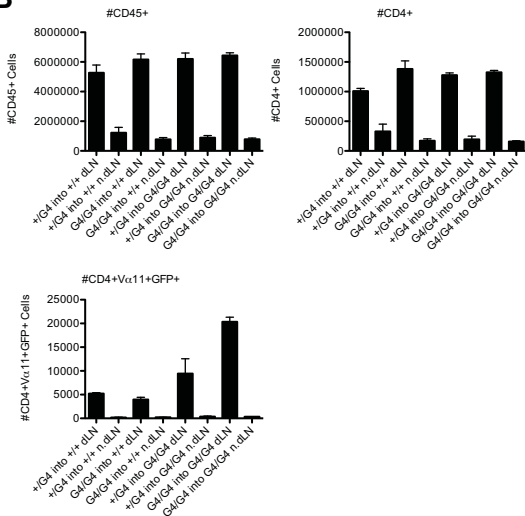

Supplementary Figure 3

Supplement: NIHMS409925-supplement-FS3.pdf [file NIHMS409925-supplement-FS3.pdf]
